# Supplementary material for: Colorimetric detection of HVA by self-assembly of Au nanorods with DNA double helices to give side-by-side and end-to-end structures
Source: Royal Society of Chemistry journal article supplement (doi:10.1039/c6ra28408f), 2017-01-01
Supplement: c6ra28408f1.pdf [file c6ra28408f1.pdf]

## Supporting information

### Colorimetric Detection of HVA by Self-assembly of Au Nanorods with DNA Double Helix Side-by-side, End-to-end Structures

Lin Chang<sup>\*a</sup>, Younas Khan<sup>\*a</sup>, Lidong Li<sup>\*a</sup>, Nan Yang<sup>a</sup>, Penggang Yin<sup>a</sup> and Lin Guo<sup>a</sup>

<sup>a</sup> Key Laboratory of Bio-Inspired Smart Interfacial Science and Technology of Ministry of Education, School of Chemistry and Environment, Beihang University, Beijing, 100191, P. R. China.

<sup>†</sup> Both authors contributed equally to this work. \* Corresponding author: E-mail: lildong@buaa.edu.cn (L. Li)

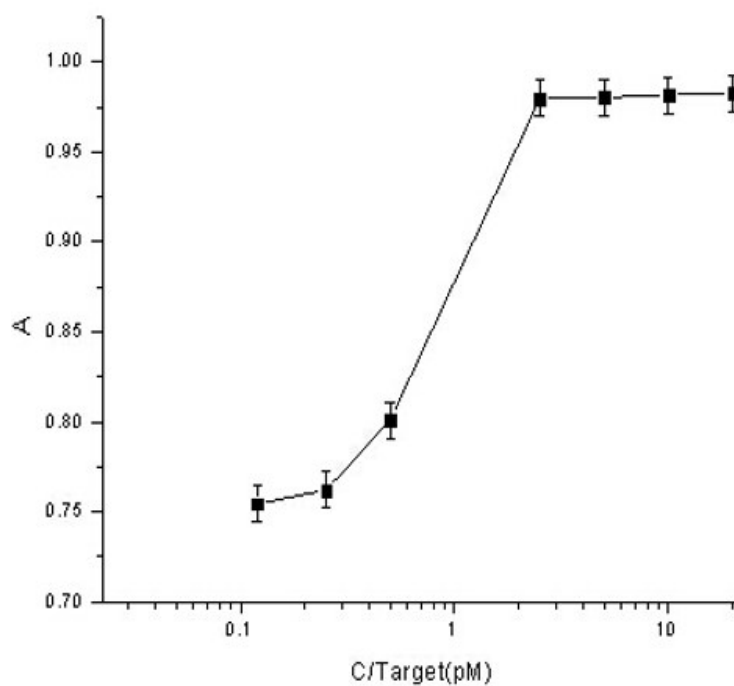

**Figure S1.** Liner relationship between absorbance with the change of concentration of Target DNA ( $C_1$  and  $C_2$  was 33 pM, Helper was 10 pM end-to-end structure), T was 0.12 pM; 0.25 pM; 0.5 pM; 2.5 pM; 5.0 pM; 10 pM; 20 pM; respectively). The error bars indicate the standard deviation of the seven successive measurements of a sample for each assay.

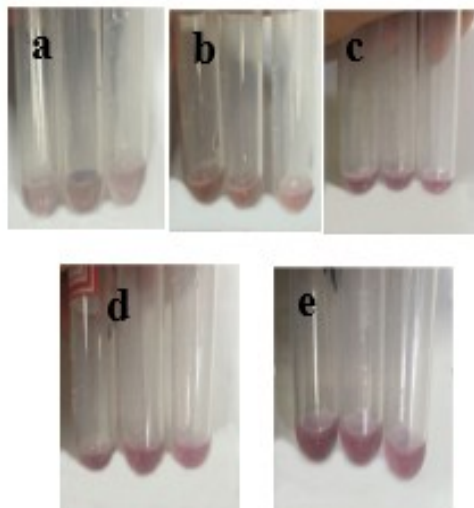

**Figure S2.** The colorimetric response to different concentration of HVA in the presence of  $C_1$  and  $C_2$  was 33 pM, Helper was 10 pM (side-by-side structure), T was a) 0.5 pM; b)1.25 pM; c) 5 pM; d)10 pM; e)35 pM respectively.

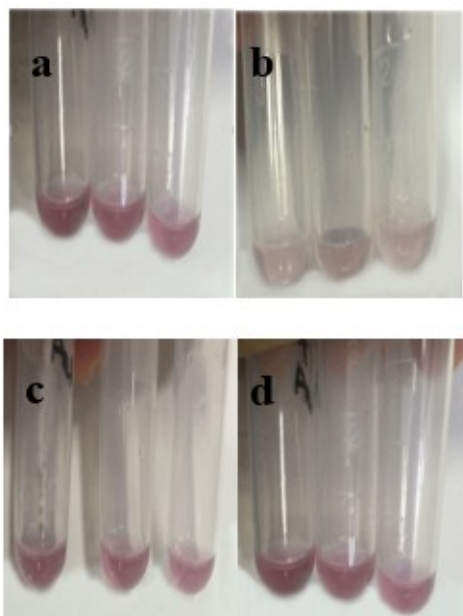

**Figure S3.** The color change of the contrast experiment. From left to right was a)second deionized water; b) HVA and c) other DNA 1; d) other DNA 2.

**Table S1.** The performance comparison with other sensors

|                  |                                      |                                    |                                                                                            |                                               |            |
|------------------|--------------------------------------|------------------------------------|--------------------------------------------------------------------------------------------|-----------------------------------------------|------------|
| Detection method | magnetic florescence <sup>[33]</sup> | Raman spectroscopy <sup>[34]</sup> | antibodies based enzyme immunoassays (EIAs) and radio immuno assays (RIAs) <sup>[35]</sup> | SPR based colorimetric method <sup>[36]</sup> | Our method |
| Detection limit  | 0.1pM                                | 1pM                                | 1pM                                                                                        | 10pM                                          | 0.05pM     |
